# Supplementary material for: Role of Interferon Regulatory Factor 7 in Corneal Endothelial Cells After HSV-1 Infection
Source: Research Square preprint supplement (doi:10.21203/rs.3.rs-551034/v1), 2021-06-03
Supplement: Supplementary file 2 [file 2b25d21976ed443dec32ca1b.docx]

**Supplementary Figure 1.** Effect of IRF7 inhibition on HSV-1-induced cytokine mRNA panel. HCEn cells were transfected with siRNA of IRF7 or control siRNA and infected with HSV-1. Cytokine mRNA induction was assessed using real-time RT-PCR at 12 h PI. The induction of IFN-β and CIITA is significantly reduced by IRF7 inhibition. N = 8, ANOVA Tukey test.

**Supplementary Figure 2.** Effect of IRF7 inhibition on mRNA panel of MHC class I antigen presentation. The expression of the mRNA of LMP2, TAP1, and β2-microglobulin (β2M) was assessed using real-time RT-PCR at 12 h PI. The mRNA of LMP2 induction was significantly reduced for IRF7 ∆DBD HCEn. N = 8, ANOVA Tukey test.
