# Supplementary material for: Role of Interferon Regulatory Factor 7 in Corneal Endothelial Cells After HSV-1 Infection
Source: Research Square preprint supplement (doi:10.21203/rs.3.rs-551034/v1), 2021-06-03
Supplement: Supplementary file 3 [file 1a9bfaa602b8ace486f4bcfe.docx]

| Supplementary Table 1. List of primer pairs | | |
| --- | --- | --- |
| IRF3 | forward | ACCAGCCGTGGACCAAGAG |
|  | reverse | TACCAAGGCCCTGAGGCAC |
| IRF4 | forward | GACAACGCCTTACCCTTCG |
|  | reverse | AGGGGTGGCATCATGTAGTT |
|  | probe | UPL #3(Roche:04 685 008 001) |
| IRF7 | forward | TGGTCCTGGTGAAGCTGGAA |
|  | reverse | GATGTCGTCATAGAGGCTGTTGG |
| CIITA TypeⅢ | forward | ACGCCCTGCTGGGTCC |
|  | reverse | AACTCCATGGTGGCACACTG |
| IL-2 | forward | AAGAATCCCAAACTCACCAGGAT |
|  | reverse | TCTAGACACTGAAGATGTTTCAGTTCTG |
| IL-6 | forward | GATGAGTACAAAAGTCCTGATCCA |
|  | reverse | CTGCAGCCACTGGTTCTGT |
|  | probe | UPL #40(Roche:04 687 990 001) |
| IL-28 | forward | AGGGCCAAAGATGCCTTAGA |
|  | reverse | TCCAGAACCTTCAGCGTCAG |
| IL-29 | forward | GGACGCCTTGGAAGAGTCAC |
|  | reverse | AGCTGGGAGAGGATGTGGT |
| ICP0 | forward | AGCGAGTACCCGCCGGCCTG |
|  | reverse | CAGGTCTCGGTCGCAGGGAAAC |
| β2-microglobulin | forward | TGCTGTCTCCATGTTTGATGTATCT |
|  | reverse | TCTCTGCTCCCCACCTCTAAGT |
| LMP2 | forward | CGTTGTGATGGGTTCTGATTCC |
|  | reverse | GACAGCTTGTCAAACACTCGGTT |
| HLA-A | forward | AAAAGGAGGGAGTTACACTCAGG |
|  | reverse | GCTGTGAGGGACACATCAGAG |
| TAP1 | forward | AGGTACTGCTCTCCATCTAC |
|  | reverse | AGTGTAAGGGAGTCAACAGA |
| IFN-β | forward | CATTACCTGAAGGCCAAGGA |
|  | reverse | CAATTGTCCAGTCCCAGAGG |
| GAPDH | forward | AGCCACATCGCTCAGACAC |
|  | reverse | GCCCAATACGACCAAATCC |
